# Supplementary material for: Upregulation of LIMK1 Is Correlated With Poor Prognosis and Immune Infiltrates in Lung Adenocarcinoma
Source: Front Genet. 2021 Jun 3;12:671585. doi: 10.3389/fgene.2021.671585 (PMC8209497; doi:10.3389/fgene.2021.671585)
Supplement: Supplementary file 3 [file Table_2.XLSX]

## Sheet: Sheet 1
Samples
